# Supplementary material for: Short-term cold exposure supports human Treg induction in vivo
Source: PubMed Central journal article supplement — Mol Metab. 2019 Aug 5;28:73–82. doi: 10.1016/j.molmet.2019.08.002 (PMC6822223; doi:10.1016/j.molmet.2019.08.002), 2019-08-05

## Supplemental Figure 2

Correlation of Treg induction potential  $T_0$   
with plasma leptin levels in females

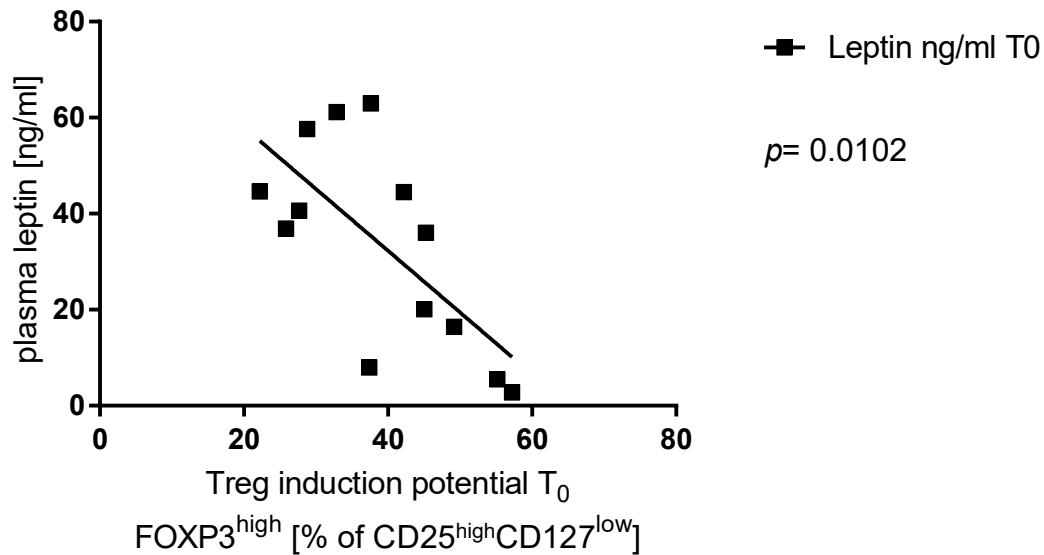

Supplement: mmc2.pdf [file mmc2.pdf]
