# Supplementary material for: Short-term cold exposure supports human Treg induction in vivo
Source: PubMed Central journal article supplement — Mol Metab. 2019 Aug 5;28:73–82. doi: 10.1016/j.molmet.2019.08.002 (PMC6822223; doi:10.1016/j.molmet.2019.08.002), 2019-08-05
Supplement: mmc3.pdf [file mmc3.pdf]

# Supplemental Figure 3

*ex vivo* Treg frequencies in peripheral blood before/after *in vivo* cold exposure

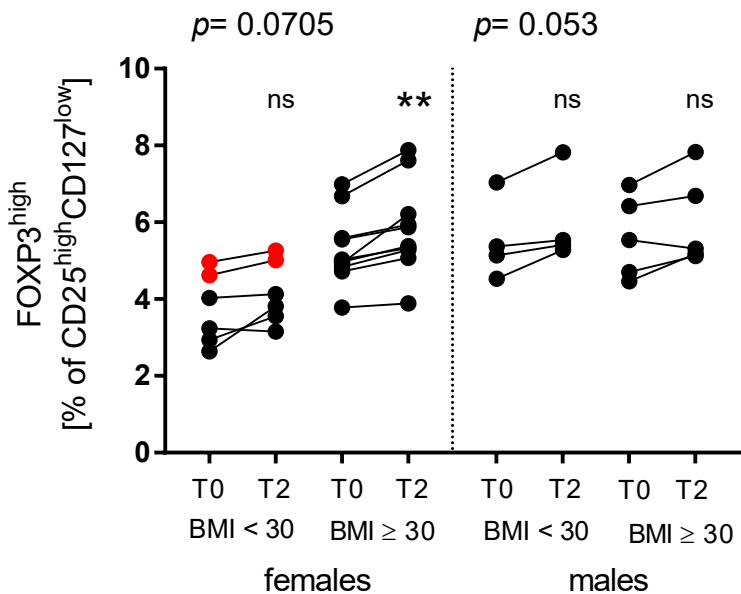

lean = BMI < 25

overweight (red dots) =  $25 \geq$  BMI < 30

obese = BMI  $\geq$  30
